# Supplementary material for: Simultaneous Protein Quantitation and Glycosylation Profiling of Antigen-Specific Immunoglobulin G1 in Large Clinical Studies
Source: PubMed Central journal article supplement (PMC11629375; doi:10.1021/acs.jproteome.4c00538), 2024-11-13
Supplement: pr4c00538_si_001.pdf [file pr4c00538_si_001.pdf]

# **Simultaneous protein quantitation and glycosylation profiling of antigen-specific immunoglobulin G1 in large clinical studies**

Steinar Gijze<sup>1</sup>, Anna Wasynczuk<sup>1</sup>, Leanne van Leeuwen<sup>2</sup>, Marloes Grobber<sup>3</sup>, Marit J. van Gils<sup>3</sup>, Jan Nouta<sup>1</sup>, Wenjun Wang<sup>1</sup>, Virgil ASH Dalm<sup>4</sup>, Hetty Jolink<sup>5</sup>, Manfred Wuhrer<sup>1</sup>, David Falck<sup>1,\*</sup>

<sup>1</sup> Center for Proteomics and Metabolomics, Leiden University Medical Center, Leiden, The Netherlands

<sup>2</sup> Department of Viroscience, Erasmus University Medical Center, Rotterdam, The Netherlands

<sup>3</sup> Department of Medical Microbiology and Infection Prevention, Amsterdam UMC location AMC University of Amsterdam, Amsterdam, The Netherlands

<sup>4</sup> Department of Internal Medicine, Division of Allergy & Clinical Immunology; Department of Immunology, Erasmus University Medical Center, Rotterdam, The Netherlands

<sup>5</sup> Department of Infectious Diseases, Leiden University Medical Center, Leiden, The Netherlands

\*d.falck@lumc.nl

## **Table of contents:**

|                                                                                              |     |
|----------------------------------------------------------------------------------------------|-----|
| Table S1: compositions, names and structures of IgG1 glycans                                 | S-2 |
| Figure S1: Correlation of anti-Spike IgG1 concentrations with anti-Spike IgG Luminex® levels | S-3 |
| Figure S2: Variability in the signal of the SIL (glyco-)peptides                             | S-4 |
| Figure S3: Identification of IgG1 proteotypic peptide                                        | S-5 |
| Figure S4: Anti-S IgG1 concentrations based on TTP                                           | S-6 |
| Figure S5: Anti-Spike IgG1 concentrations (Glycopeptides and GPS separately)                 | S-6 |
| Figure S6: Correlation of utilized (glyco-)peptides for anti-Spike IgG1 concentrations       | S-7 |
| Figure S7: Anti-Spike IgG1 concentrations (ng/mL) in the EMC pool samples                    | S-8 |
| Figure S8: IgG3 quantitation                                                                 | S-9 |

**Table S1: Compositions, names and structures of IgG1 glycans.**

| Glycan composition | Name               | Structure* | GlyTouCan structure ID*                       |
|--------------------|--------------------|------------|-----------------------------------------------|
| H3N3F1             | G0F-N              |            | G07483YN                                      |
| H4N3F1             | G1F-N              |            | G12398HZ or                                   |
| H4N3F1S1           | G1FS-N             |            | G30109UP                                      |
| H3N4               | G0                 |            | G39213VZ                                      |
| H4N4               | G1                 |            | G66937TJ and<br>G89993FE                      |
| H5N4               | G2                 |            | G36191CD                                      |
| H5N4S1             | G2S                |            | G94239KE<br>(sialic acid is $\alpha$ 2-       |
| H3N4F1             | G0F                |            | G80858MF                                      |
| H4N4F1             | G1F                |            | G58667NI and<br>G27919IH                      |
| H4N4F1S1           | G1FS               |            | G43694RQ or<br>G23295TF                       |
| H5N4F1             | G2F                |            | G78059CC                                      |
| H5N4F1S1           | G2FS               |            | G81413UE                                      |
| H5N4F1S2           | G2FS2              |            | G56749GV                                      |
| H3N5F1             | G0FN               |            | G30159WR                                      |
| H4N5F1             | G1FN               |            | G85767HW or<br>G71013KY                       |
| H4N5F1S1           | G1FNS              |            | G39472EX                                      |
| H5N5F1             | G2FN               |            | G25520XG                                      |
| H5N5F1S1           | G2FNS              |            | G18422YU<br>(sialic acid is $\alpha$ 2-<br>6) |
| H6N3F1S1           | Man5G1FS<br>hybrid |            | G93107BF                                      |
| H6N4F1             | Man5G1FN<br>hybrid |            |                                               |

\*We assumed that 1) all structures have a normal N-glycan core, 2) the first GlcNAc modifies the  $\alpha$ 1-3 arm, 3) linkages are  $\beta$ 2,  $\beta$ 4 and  $\alpha$ 6 for GlcNAc, Gal and Sia, respectively, and 4) the third GlcNAc is a bisecting GlcNAc.

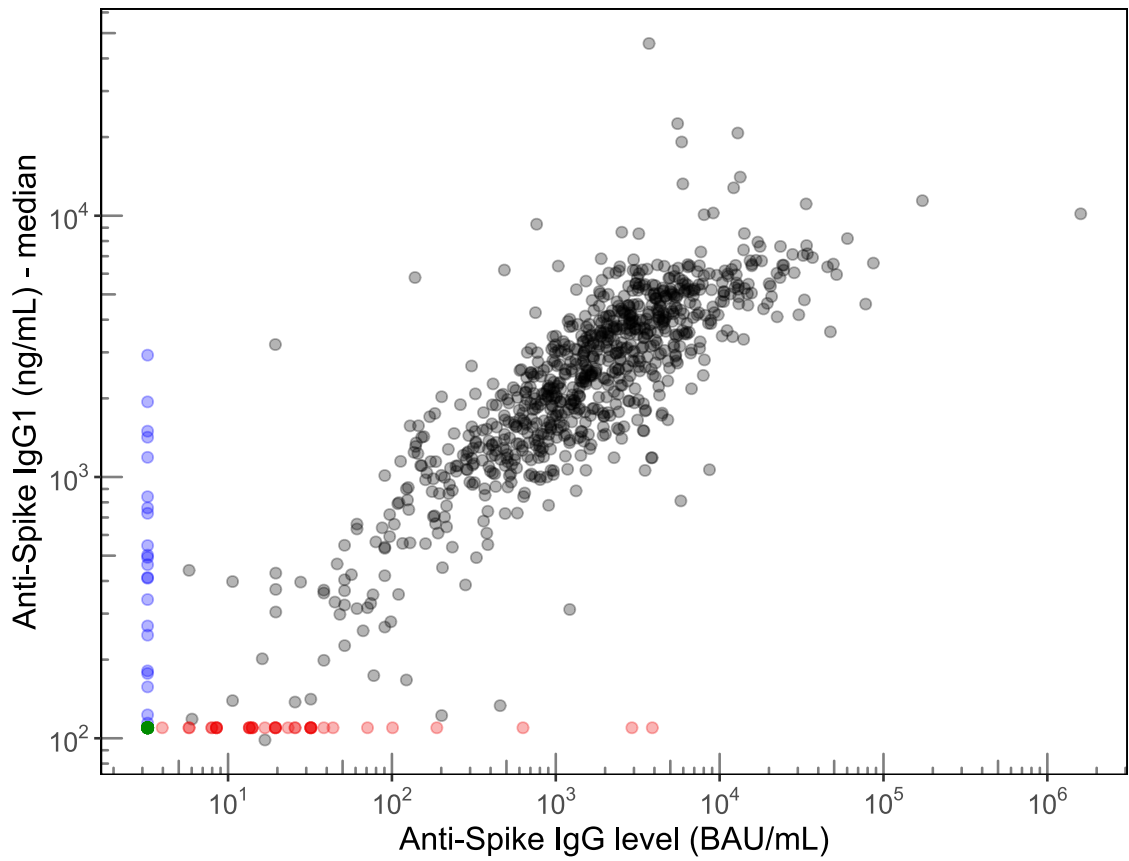

- level > LOQ & glycopeptides > LOQ (n = 844)
- level ≤ LOQ & glycopeptides ≤ LOQ (n = 31)
- level ≤ LOQ & glycopeptides > LOQ (n = 22)
- level > LOQ & glycopeptides ≤ LOQ (n = 36)

**Figure S1:** Correlation of anti-Spike IgG1 concentrations with anti-Spike IgG Luminex® levels. This figure includes samples for which the level was at the limit of quantitation (LOQ = 3.23 BAU/mL), and/or for which the sum spectra failed curation. Samples whose sum spectra failed curation are assigned a concentration of 109.7 ng/mL, which is equal to the LOQ of our method.  $r = 0.86$  ( $p < 0.001$ ).  $n = 933$ .

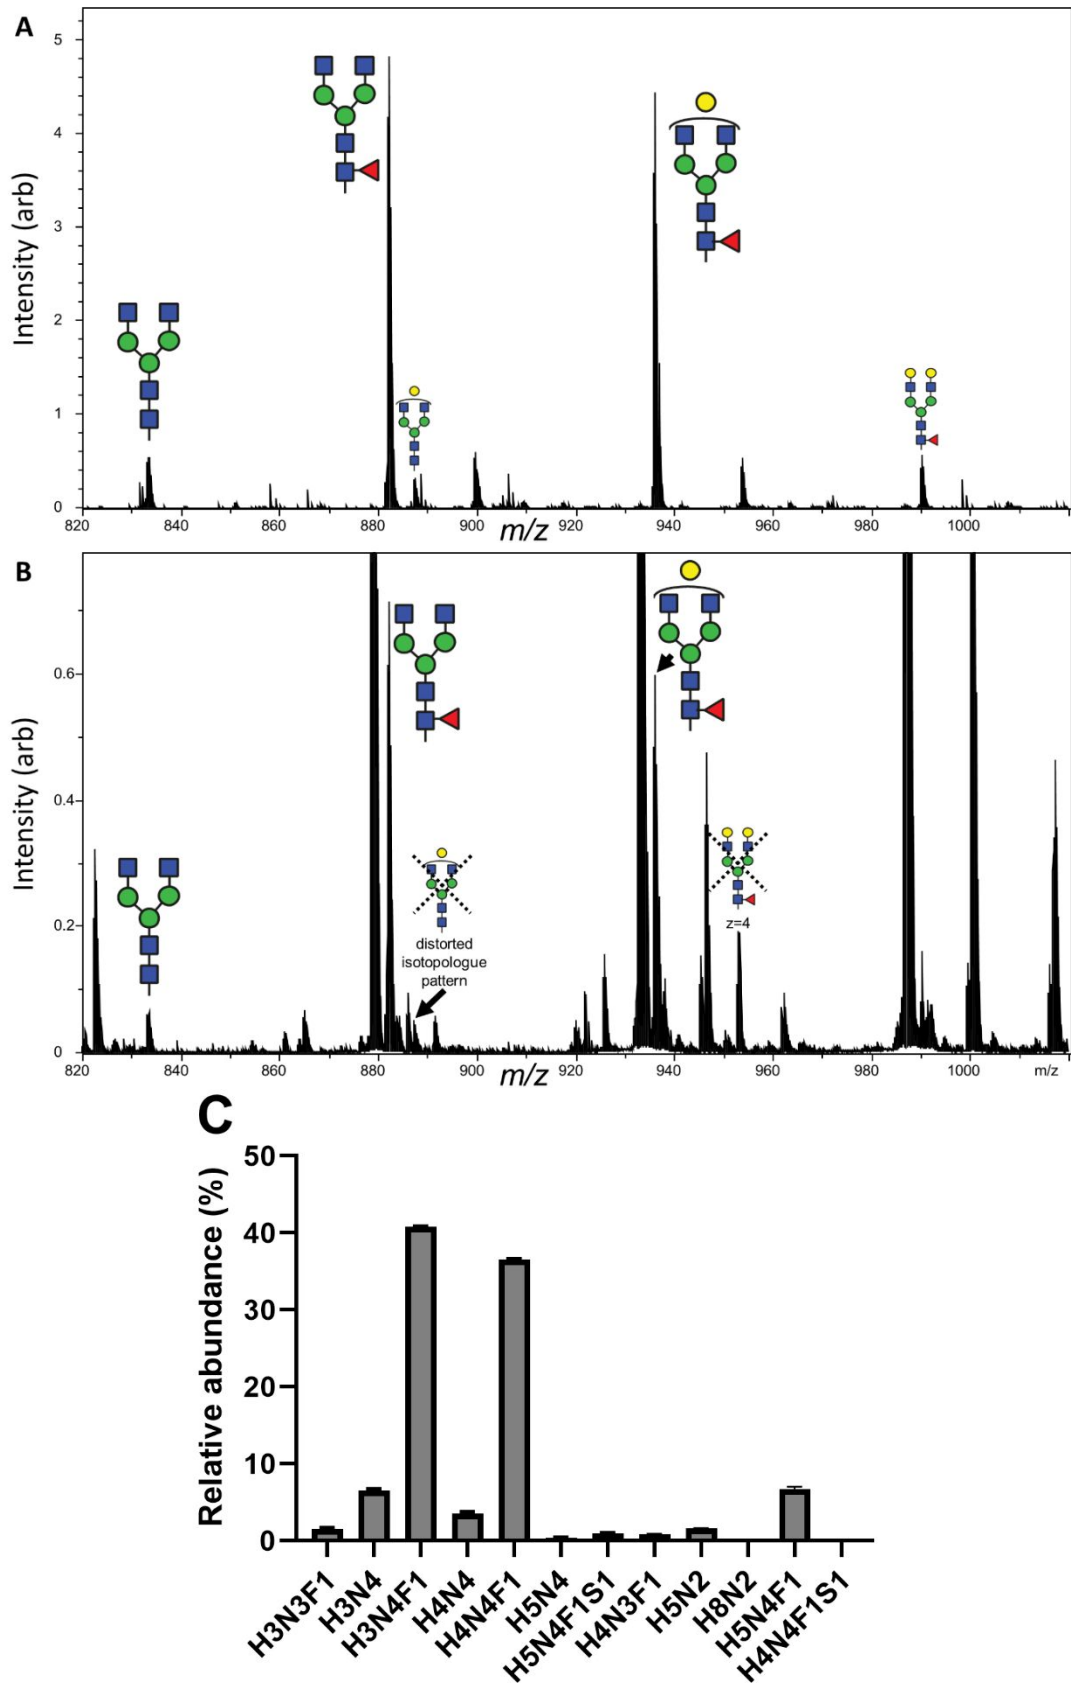

**Figure S2:** Characterization of SILu™MAB glycosylation. A) Annotated sum spectrum of direct measurement (mass range of  $[M+3H]^{3+}$ -ions). B) Annotated sum spectrum of sample with spiked SILu™MAB (mass range of  $[M+3H]^{3+}$ -ions; Zoom to intensity range of SILuMAB). Crossed out structures of G1 and G2F indicate that these SILuMAB glycopeptides could not be quantified in the cohort measurements with the reason for exclusion of signals reported below the cartoon. C) Glycosylation profile from three technical replicate measurements of the SILuMAB protein standard in buffer matrix.

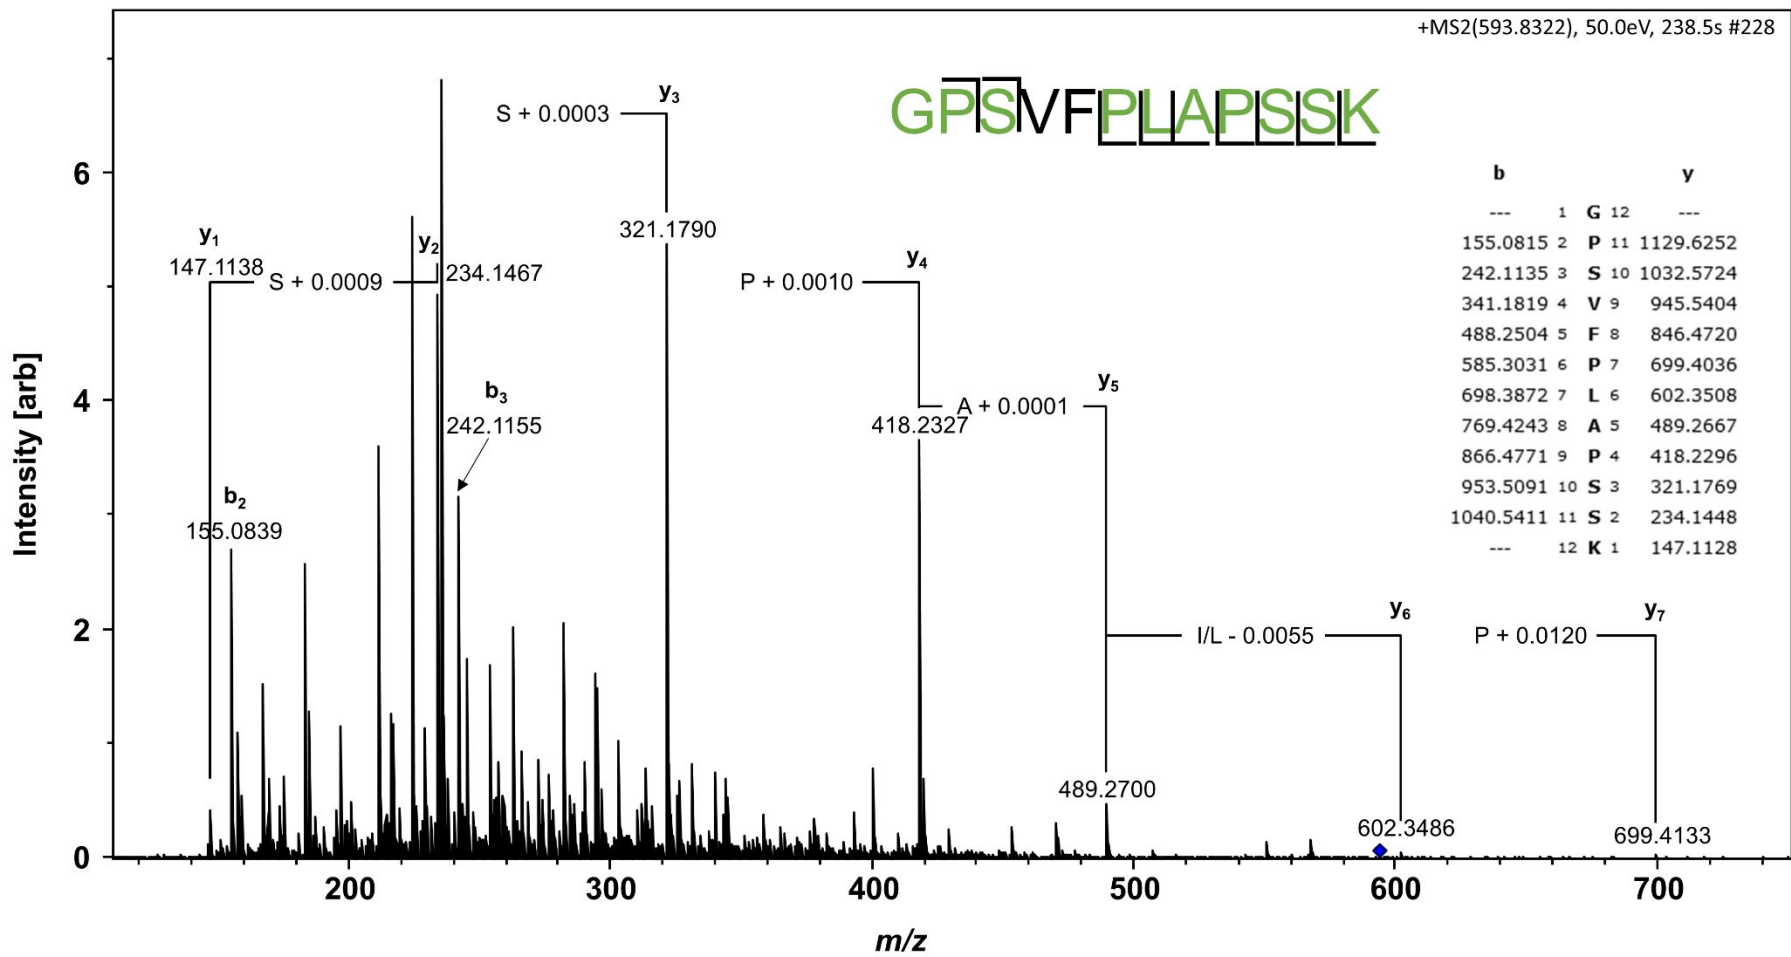

**Figure S3:** Identification of IgG1 proteotypic peptide. Distances calculated with DataAnalysis (Bruker Daltonics, Bremen, Germany). Theoretical values taken from <https://prospector.ucsf.edu/prospector/cgi-bin/msform.cgi?form=msproduct>.

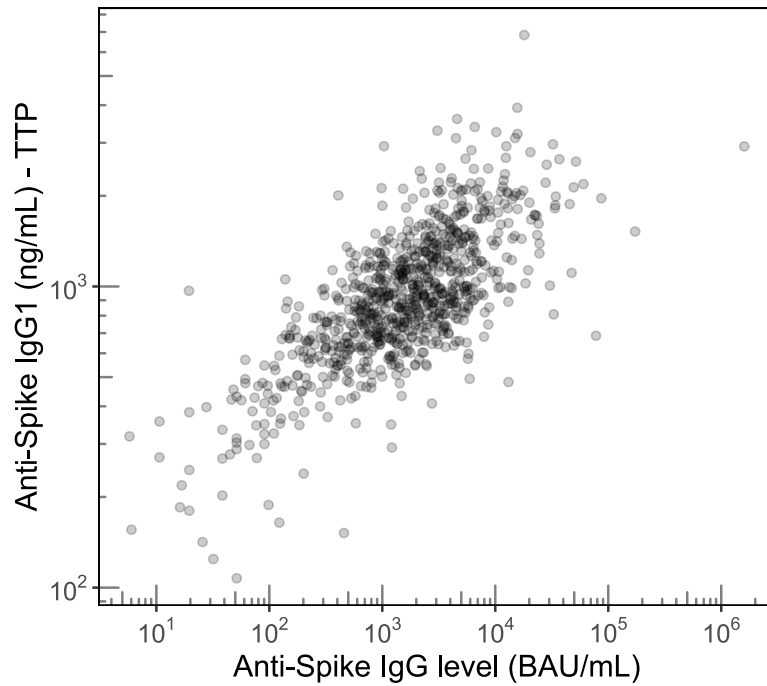

**Figure S4:** Anti-S IgG1 concentrations based on the TTP peptide plotted against the Luminex® anti-S IgG levels. Only samples yielding a value in both methods were included.  $r = 0.69$  ( $p < 0.001$ ).  $n = 844$ . BAU = Binding Antibody Units.

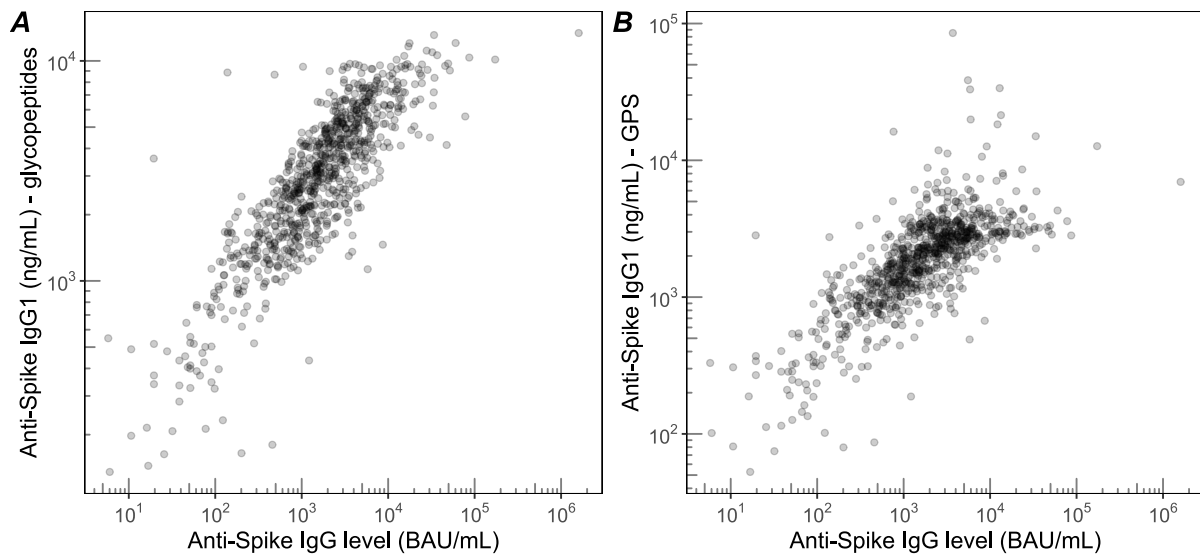

**Figure S5:** (A) Anti-Spike IgG1 concentrations calculated based on the glycopeptides plotted against the Luminex® anti-Spike IgG levels.  $r = 0.84$  ( $p < 0.001$ ).  $n = 844$ . (B) Anti-Spike IgG1 concentrations calculated based on the proteotypic peptide GPS.  $r = 0.76$  ( $p < 0.001$ ).  $n = 844$ .

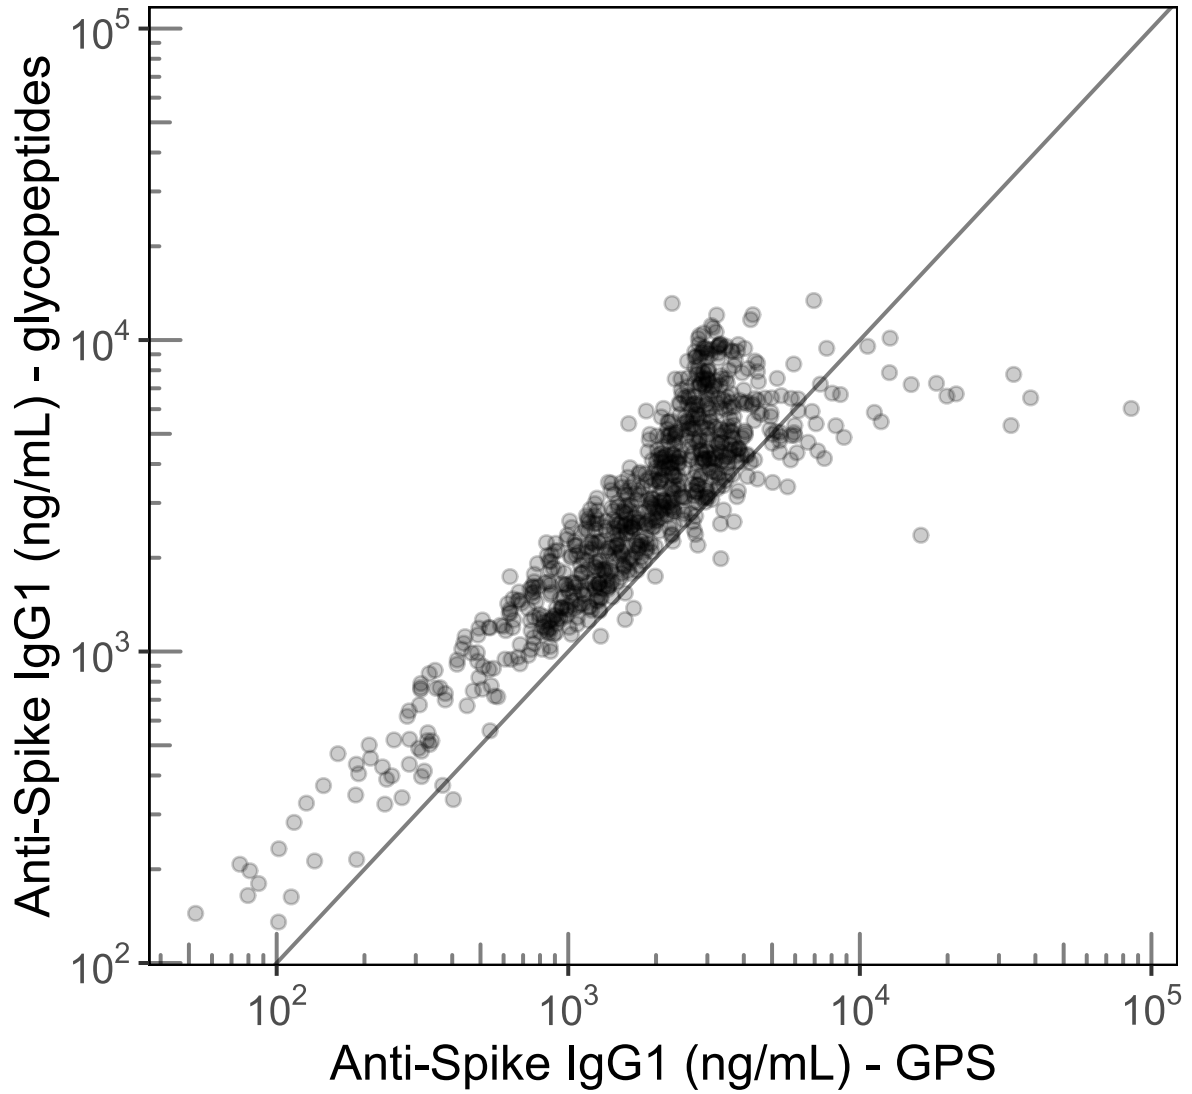

**Figure S6:** GLYcoLISA anti-S IgG1 concentrations calculated based on glycopeptides correlate strongly with those based on the proteotypic peptide GPS.  $r = 0.88$  ( $p < 0.001$ ,  $n = 844$ ). A line of equality ( $y = x$ ) is shown for comparison of the two quantitations.

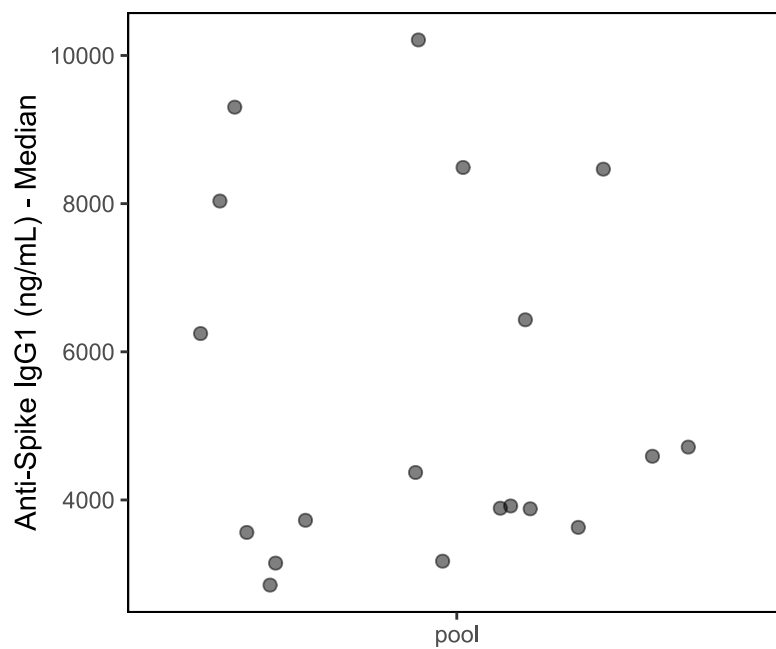

**Figure S7: Intermediate precision of IgG1 quantitation and utility of correction.** A) Anti-Spike IgG1 concentrations (ng/mL) in the EMC pool samples (N = 19). Mean = 5402 ng/mL and RSD = 44%. One outlier was removed after performing a Grubb's test.



**A**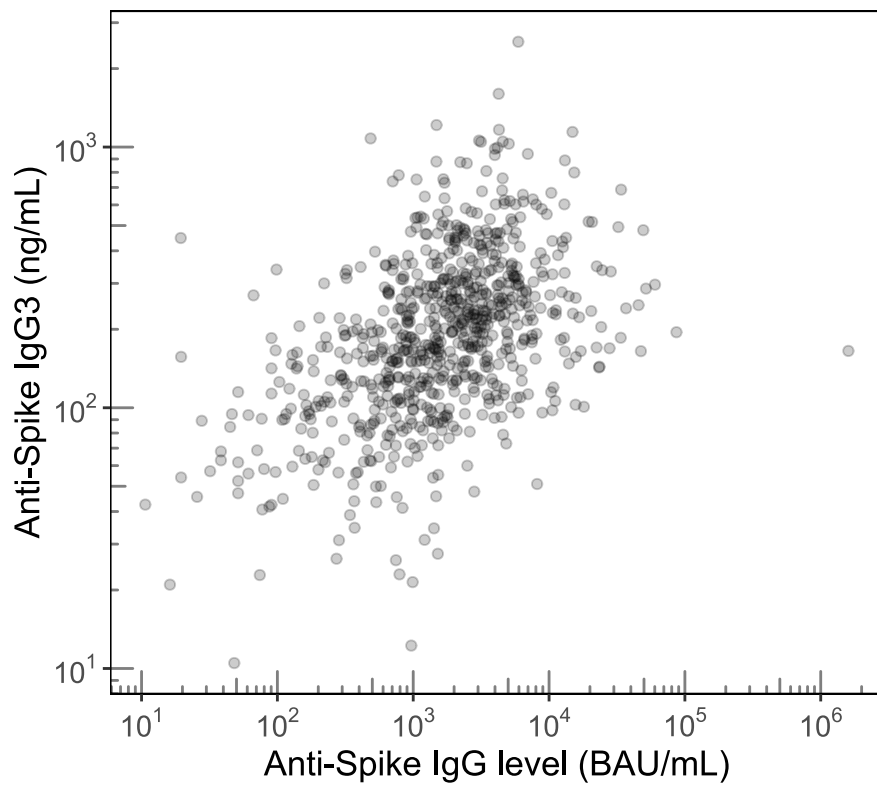**B**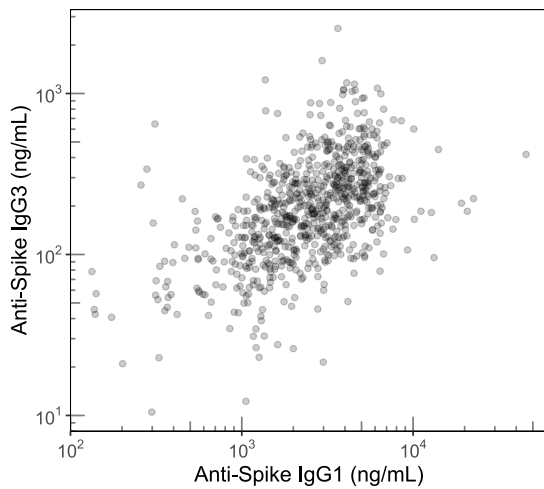**C**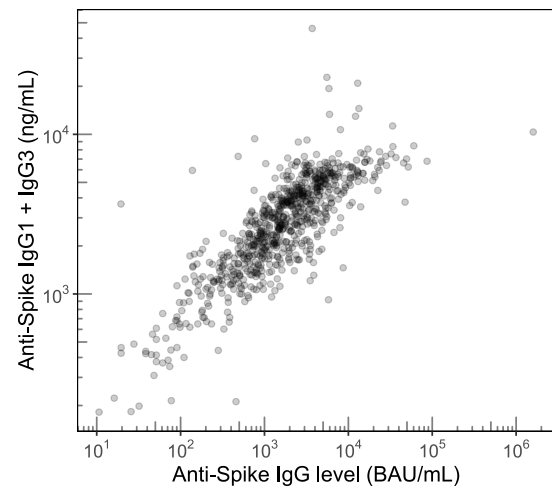

**Figure S8:** IgG3 quantitation. A) Correlation of IgG3 with Luminex® levels ( $r = 0.49$ ,  $p < 0.001$ ). B) Correlation between IgG1 and IgG3 concentrations as assessed by our method ( $r = 0.54$ ,  $p < 0.001$ ). C) Correlation between the sum of IgG1 and IgG3 concentrations with Luminex® levels ( $r = 0.81$ ,  $p < 0.001$ ).

IgG3 analytes: H3N4F1, H4N4F1, H4N4F1S1, H4N5F1, H5N4F1, H5N4F1S1
